# Supplementary material
Source: PubMed Central journal article supplement (PMC2703716)
Supplement: NIHMS80147-supplement-01.pdf [file NIHMS80147-supplement-01.pdf]

Cell, Volume 135

**Supplemental Data**

***FLO1* Is a Variable Green Beard Gene  
that Drives Biofilm-like Cooperation  
in Budding Yeast**

Scott Smukalla, Marina Caldara, Nathalie Pochet, Anne Beauvais, Stephanie Guadagnini,  
Chen Yan, Marcelo D. Vincas, An Jansen, Marie Christine Prevost, Jean-Paul Latgé,  
Gerald R. Fink, Kevin R. Foster, and Kevin J. Verstrepen

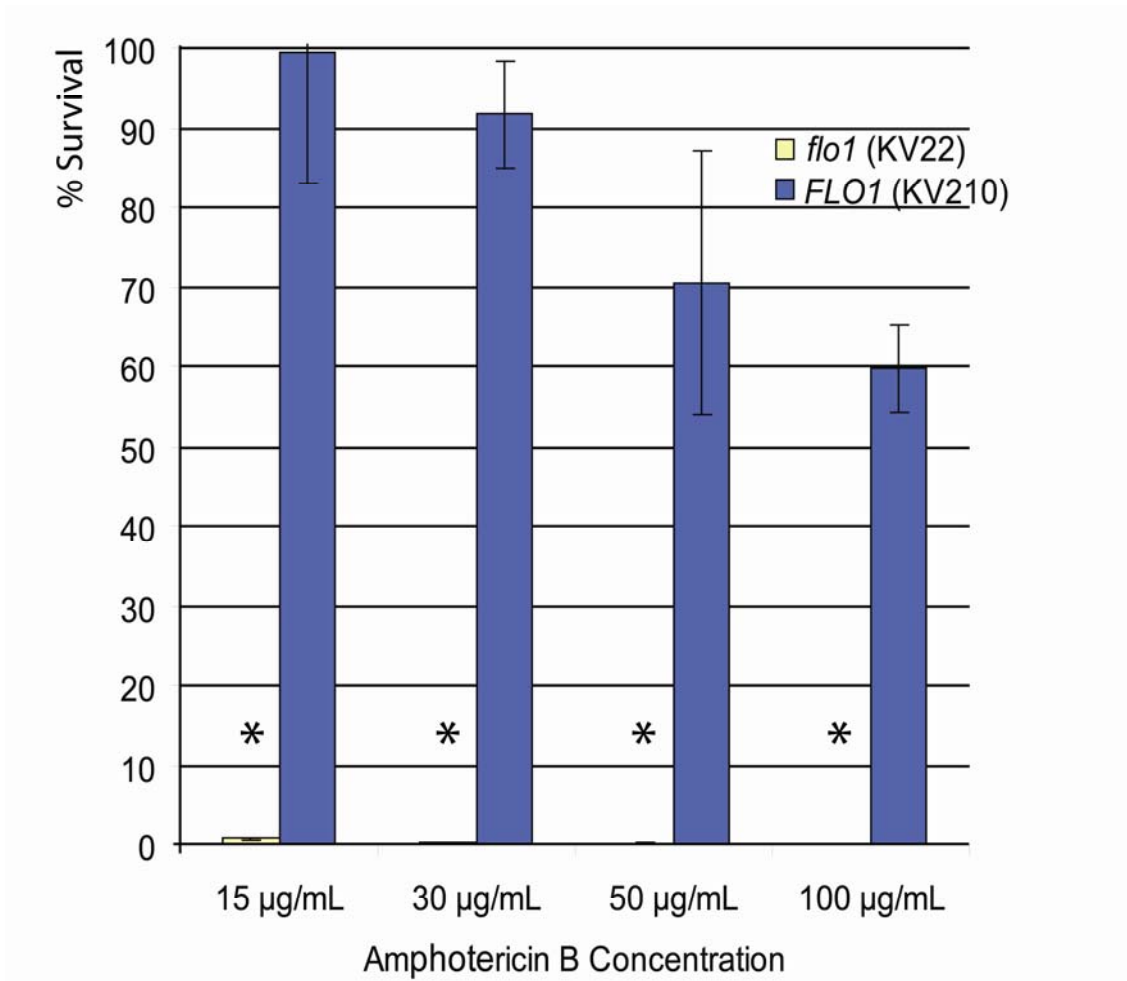

**Figure S1. Flocculent cultures are resistant to extremely high concentrations of amphotericin B.** Flocculent (*FLO1*, KV210) and non-flocculent (*flo1*, KV22) cells were subjected to increasing concentrations of amphotericin B for 4 hours, after which the percentage of surviving cells was determined. Asterisks indicate statistical differences between the flocculating and non-flocculating cultures ( $\alpha = 0.05$ ). Error bars represent standard deviation.

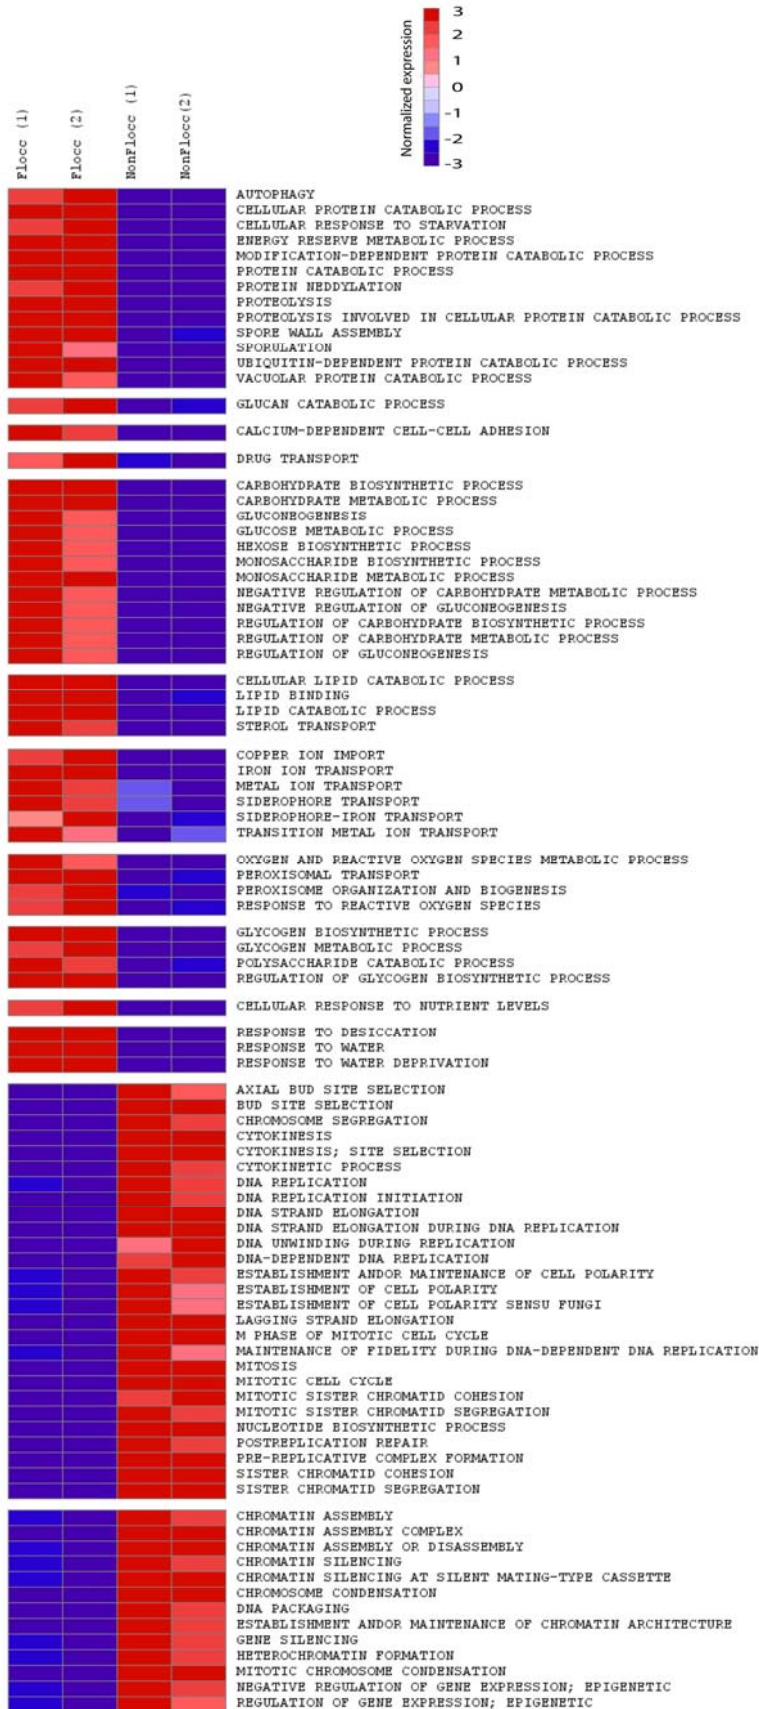

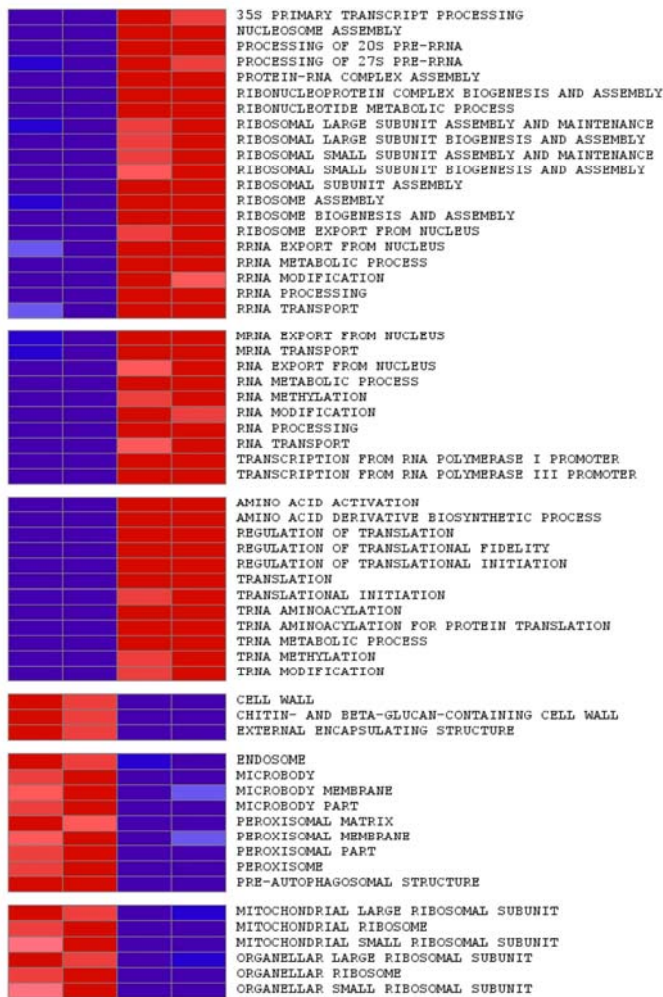

**Figure S2. Flocculating and non-flocculating cells show differential expression of several gene sets.** Gene Ontology (GO) gene sets describing biological processes and cellular components (rows) that differ significantly between flocculating and non-flocculating experiments are shown. The gene sets are grouped according to higher-order categories. For each gene set, the median expression of the leading-edge genes in each experiment from the two conditions is shown (columns). Furthermore, each gene set was normalized by mean centering and unit scaling prior to visualization. Red and blue respectively represent induction and repression as compared to average across all experiments.

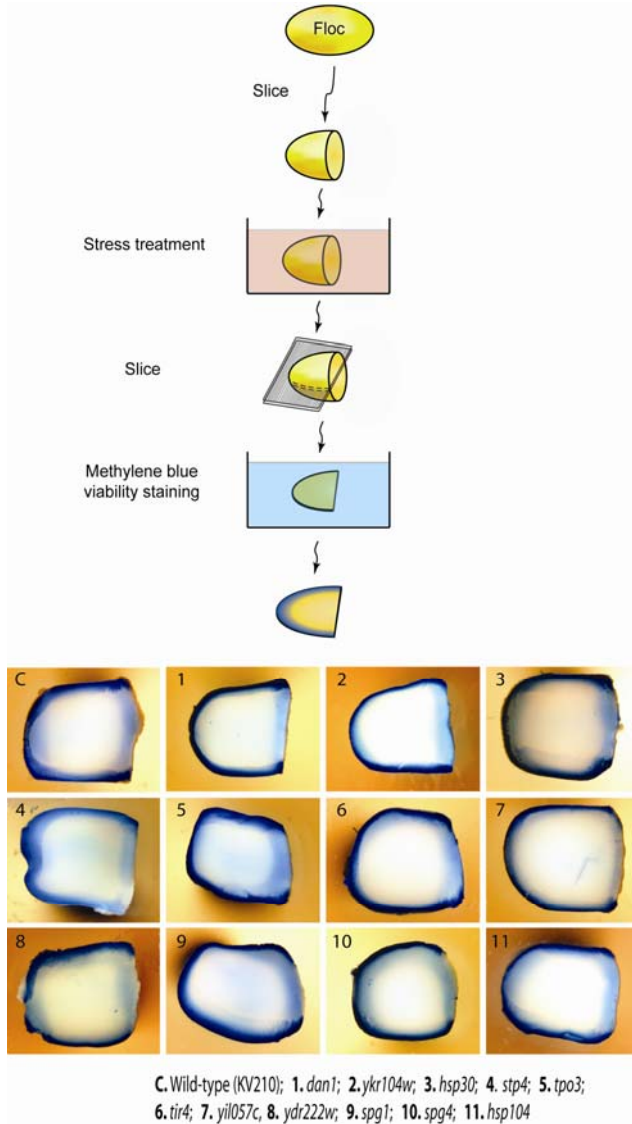

**Figure S3. Deletion of genes that are upregulated in flocculating cultures does not affect resistance to amphotericin B.** We constructed ten mutant strains of the flocculent (*FLO1*<sup>+</sup>) strain KV210. Each of these mutant strains lacks a functional copy of one gene that is upregulated in flocculating cultures (see our gene array analyses). Flocs of these strains were first cut in half before they were submerged into medium containing 100  $\mu\text{g ml}^{-1}$  amphotericin B for 45 minutes. After this treatment, slices of the floc were stained with the methylene blue dye to test for viability (blue cells are dead). Survival was also measured by plating (not shown). No significant differences in amphotericin B resistance were found between any of the mutants and the wild-type control (KV210)

## Correlation between EM93 flocculation and amphotericin B resistance

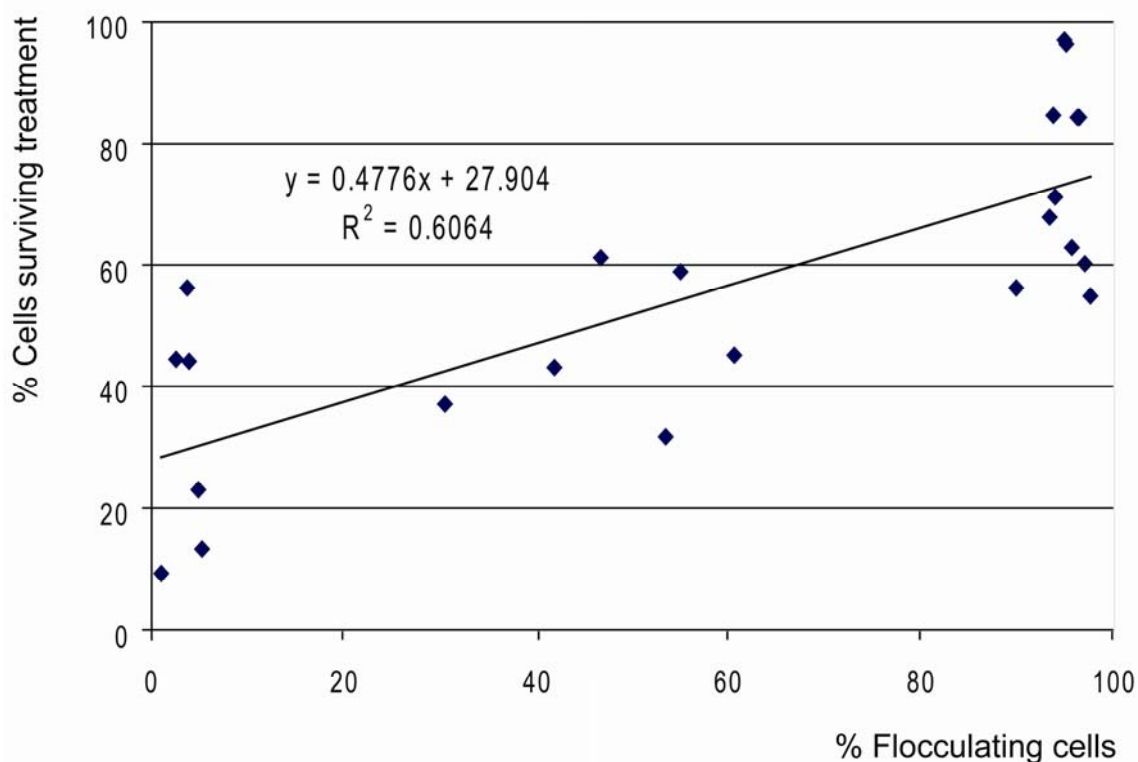

**Figure S4. Correlation between flocculation and amphotericin B resistance in the feral *S. cerevisiae* strain EM93.** Flocculation and % survival after a 4-hour treatment with  $100 \mu\text{g ml}^{-1}$  amphotericin B was measured for 24 haploid derivatives of the feral EM93 strain. The observed positive Pearson correlation between flocculation and amphotericin B resistance indicates that about 60% of the variability in amphotericin B resistance among the 24 strains may be the result of differences in flocculation behavior ( $p < 1 \cdot 10^{-5}$ ).

**A**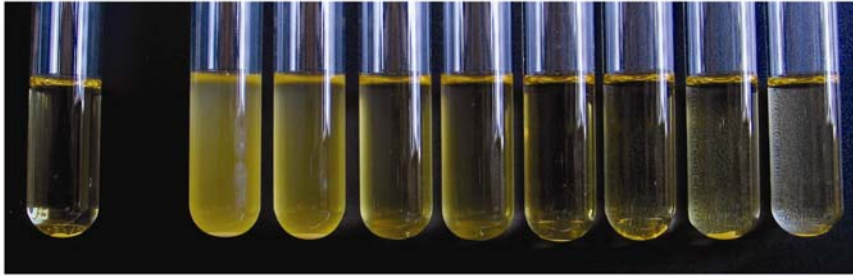**B**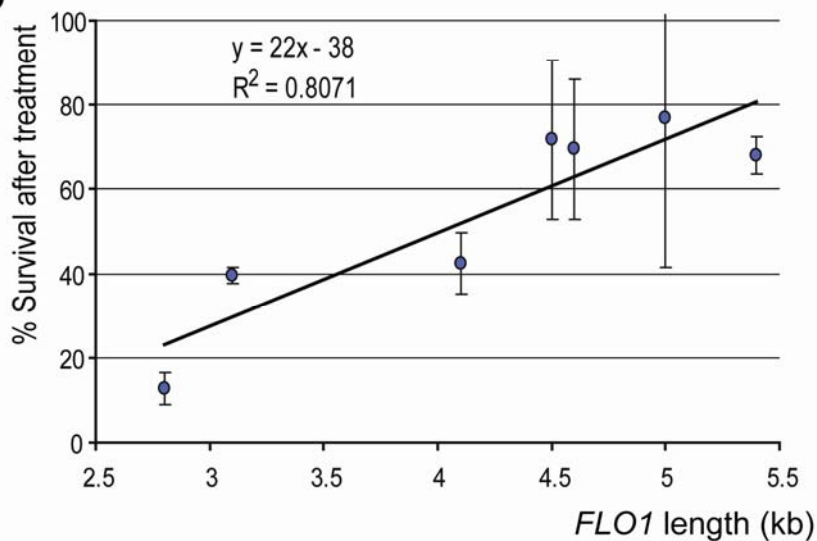

**Figure S5. Flocculation and resistance to amphotericin B correlate with the length of the hypervariable internal repeat region in the *FLO1* gene.** The *S. cerevisiae* *FLO1* gene contains a stretch of internal tandem repeats. This region is extremely variable, with the number of repeats changing at high rates. **A.** *FLO1*-dependent flocculation gradually increases with an increasing number of internal *FLO1* repeat units (left to right). **B.** Strains overexpressing *FLO1* alleles with an increasing number of internal repeat units show gradually increasing resistance to amphotericin B. Error bars represent standard deviation.

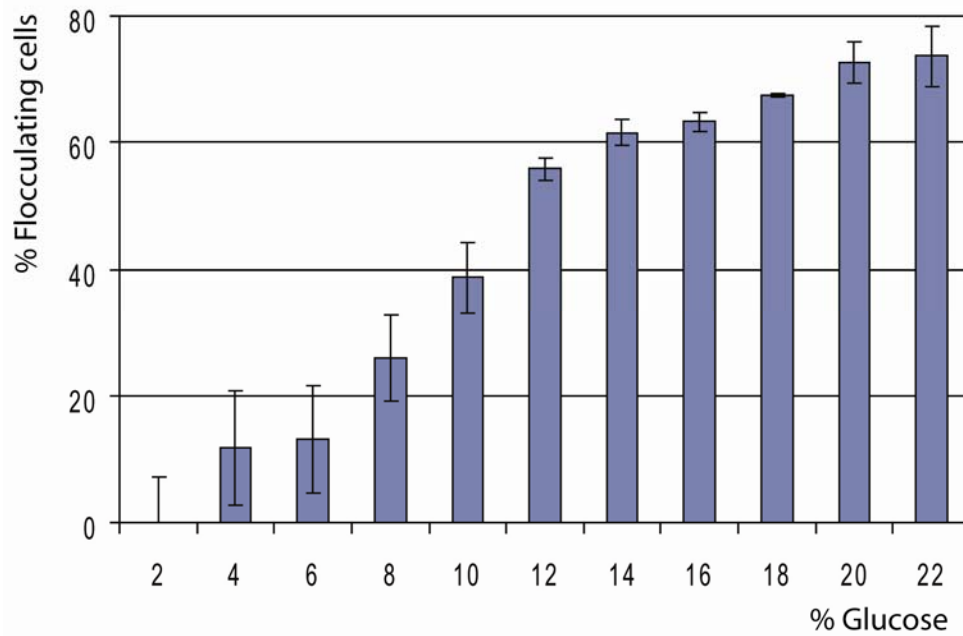

**Figure S6. Flocculation of the feral EM93 strain increases with increasing initial glucose concentration of the growth medium.** Cultures of EM93 cells were grown in YPD medium containing increasing levels of glucose. Flocculation was measured after 24h of growth. Error bars represent standard deviation.



**Table S1. Yeast strains**

| Strain                                                                                     | Relevant Genotype                                                                                                                                                                                | Reference/Source              |
|--------------------------------------------------------------------------------------------|--------------------------------------------------------------------------------------------------------------------------------------------------------------------------------------------------|-------------------------------|
| S288C (BY4742)                                                                             | MAT $\alpha$ ; <i>his3D1</i> ; <i>leu2D0</i> ; <i>lys2D0</i> ; <i>ura3D0</i>                                                                                                                     | (Brachman et al., 1998)       |
| S288C (BY4743)                                                                             | MAT a/ $\alpha$ ; <i>his3D1</i> ; <i>leu2D0</i> ; <i>lys2D0</i> ; <i>ura3D0</i>                                                                                                                  | (Brachman et al., 1998)       |
| KV210                                                                                      | S288C BY4741 containing <i>GALp-FLO1</i> fusion                                                                                                                                                  | (Verstrepen et al., 2005)     |
| KV428                                                                                      | S288C BY4741 containing <i>TEFp-FLO1</i> fusion                                                                                                                                                  | This study                    |
| KV22                                                                                       | S288C BY4741 <i>flo1::KANMX</i>                                                                                                                                                                  | This study                    |
| KV211 (KV381); 219 (184); 220 (186); 224 (193); 298 (291), 308 (304), 311 (306), 312 (307) | <i>GALp::FLO1</i> fusions with various alleles of <i>FLO1</i> containing different numbers of internal DNA repeats. Numbers in brackets refer to respective parental strains without <i>GALp</i> | (Verstrepen et al., 2005)     |
| EM93                                                                                       | Mat a/ $\alpha$ Feral strain, progenitor of S288C                                                                                                                                                | (Mortimer and Johnston, 1986) |
| KV34                                                                                       | EM93 1A (haploid strain obtained from EM93, 1 <sup>st</sup> tetrad)                                                                                                                              | This study                    |
| KV35                                                                                       | EM93 1B (haploid strain obtained from EM93, 1 <sup>st</sup> tetrad)                                                                                                                              | This study                    |
| KV36                                                                                       | EM93 1C (haploid strain obtained from EM93, 1 <sup>st</sup> tetrad)                                                                                                                              | This study                    |
| KV37                                                                                       | EM93 1D (haploid strain obtained from EM93, 1 <sup>st</sup> tetrad)                                                                                                                              | This study                    |
| KV38                                                                                       | EM93 2A (haploid strain obtained from EM93, 2 <sup>nd</sup> tetrad)                                                                                                                              | This study                    |
| KV39                                                                                       | EM93 2B (haploid strain obtained from EM93, 2 <sup>nd</sup> tetrad)                                                                                                                              | This study                    |
| KV40                                                                                       | EM93 2C (haploid strain obtained from EM93, 2 <sup>nd</sup> tetrad)                                                                                                                              | This study                    |
| KV41                                                                                       | EM93 2D (haploid strain obtained from EM93, 2 <sup>nd</sup> tetrad)                                                                                                                              | This study                    |
| KV42                                                                                       | EM93 5A (haploid strain obtained from EM93, 5 <sup>th</sup> tetrad)                                                                                                                              | This study                    |
| KV43                                                                                       | EM93 5B (haploid strain obtained from EM93, 5 <sup>th</sup> tetrad)                                                                                                                              | This study                    |
| KV44                                                                                       | EM93 5C (haploid strain obtained from EM93, 5 <sup>th</sup> tetrad)                                                                                                                              | This study                    |
| KV45                                                                                       | EM93 5D (haploid strain obtained from EM93, 5 <sup>th</sup> tetrad)                                                                                                                              | This study                    |
| KV46                                                                                       | EM93 8A (haploid strain obtained from EM93, 8 <sup>th</sup> tetrad)                                                                                                                              | This study                    |
| KV47                                                                                       | EM93 8B (haploid strain obtained from EM93, 8 <sup>th</sup> tetrad)                                                                                                                              | This study                    |
| KV48                                                                                       | EM93 8C (haploid strain obtained from EM93, 8 <sup>th</sup> tetrad)                                                                                                                              | This study                    |
| KV49                                                                                       | EM93 8D (haploid strain obtained from EM93, 8 <sup>th</sup> tetrad)                                                                                                                              | This study                    |
| KV50                                                                                       | EM93 9A (haploid strain obtained from EM93, 9 <sup>th</sup> tetrad)                                                                                                                              | This study                    |
| KV51                                                                                       | EM93 9B (haploid strain obtained from EM93, 9 <sup>th</sup> tetrad)                                                                                                                              | This study                    |
| KV52                                                                                       | EM93 9C (haploid strain obtained from EM93, 9 <sup>th</sup> tetrad)                                                                                                                              | This study                    |
| KV53                                                                                       | EM93 9D (haploid strain obtained from EM93, 9 <sup>th</sup> tetrad)                                                                                                                              | This study                    |
| KV54                                                                                       | EM93 10A (haploid strain obtained from EM93, 10 <sup>th</sup> tetrad)                                                                                                                            | This study                    |
| KV55                                                                                       | EM93 10B (haploid strain obtained from EM93, 10 <sup>th</sup> tetrad)                                                                                                                            | This study                    |
| KV56                                                                                       | EM93 10C (haploid strain obtained from EM93, 10 <sup>th</sup> tetrad)                                                                                                                            | This study                    |
| KV57                                                                                       | EM93 10D (haploid strain obtained from EM93, 10 <sup>th</sup> tetrad)                                                                                                                            | This study                    |
| KV478                                                                                      | KV210 <i>dan1::HYGB</i>                                                                                                                                                                          | This study                    |
| KV479                                                                                      | KV210 <i>ykr104::HYGB</i>                                                                                                                                                                        | This study                    |

|        |                                           |                                               |
|--------|-------------------------------------------|-----------------------------------------------|
| KV480  | KV210 <i>hsp30::HYGB</i>                  | This study                                    |
| KV481  | KV210 <i>stp4::HYGB</i>                   | This study                                    |
| KV483  | KV210 <i>tpo3::HYGB</i>                   | This study                                    |
| KV485  | KV210 <i>tir4::HYGB</i>                   | This study                                    |
| KV486  | KV210 <i>hsp104::HYGB</i>                 | This study                                    |
| KV500  | KV210 <i>yil057c::HYGB</i>                | This study                                    |
| KV613  | KV210 <i>ydr222w::HYGB</i>                | This study                                    |
| KV615  | KV210 <i>spg4::HYGB</i>                   | This study                                    |
| KV617  | KV210 <i>spg1::HYGB</i>                   | This study                                    |
| KV1492 | BY4741 <i>tdh3::mCherry-HIS3</i>          | This study                                    |
| KV1493 | BY4741 <i>tdh3::yECitrine-HIS3</i>        | This study                                    |
| KV1526 | BY4741 <i>TDH3p::mCherry-HIS3</i>         | This study                                    |
| KV1527 | BY4741 <i>TDH3p::yECitrine-HIS3</i>       | This study                                    |
| KV1526 | BY4741 <i>TDH3p::mCherry-HYGB</i>         | This study                                    |
| KV1527 | BY4741 <i>TDH3p::yECitrine-HYGB</i>       | This study                                    |
| KV1579 | KV44 <i>TDH3p::yECitrine-HYGB</i>         | This study                                    |
| KV1581 | KV44 <i>TDH3p::mCherry-HYGB</i>           | This study                                    |
| KV1588 | KV48 <i>TDH3p::yECitrine-HYGB</i>         | This study                                    |
| KV1613 | KV48 <i>TDH3p::mCherry-HYGB</i>           | This study                                    |
| KV1590 | KV210 <i>TDH3p::yECitrine-HYGB</i>        | This study                                    |
| KV1591 | KV210 <i>TDH3p::mCherry-HYGB</i>          | This study                                    |
| KV1557 | <i>Saccharomyces paradoxus</i>            | National<br>Collection<br>of yeast<br>Culture |
| KV1602 | KV1557 <i>GAL<sub>p</sub>::FLO1</i>       | This study                                    |
| KV1615 | KV 1557 <i>PYK2p::mCherry-HYGB</i>        | This study                                    |
| KV1616 | KV 1602 <i>PYK2p::yECitrine-HYGB</i>      | This study                                    |
| KV1492 | BY4741 <i>tdh3::mCherry-HIS3</i>          | This study                                    |
| KV1493 | BY4741 <i>tdh3::yECitrine-HIS3</i>        | This study                                    |
| KV1526 | BY4741 <i>TDH3p::mCherry-HIS3</i>         | This study                                    |
| KV1527 | BY4741 <i>TDH3p::yECitrine-HIS3</i>       | This study                                    |
| KV1526 | BY4741 <i>TDH3p::mCherry-HYGB</i>         | This study                                    |
| KV1527 | BY4741 <i>TDH3p::yECitrine-HYGB</i>       | This study                                    |
| KV1579 | KV44 <i>TDH3p::yECitrine-HYGB</i>         | This study                                    |
| KV1873 | KV52 <i>flo1::KAN</i>                     | This study                                    |
| KV1875 | KV1873 <i>TDH3p::yECitrine-HYGB KANMX</i> | This study                                    |
| KV1876 | KV1873 <i>TDH3p::mCherry-HYGB KANMX</i>   | This study                                    |
| KV1877 | KV52 <i>TDH3p::yECitrine-HYGB KANMX</i>   | This study                                    |
| KV1878 | KV52 <i>TDH3p::mCherry-HYGB KANMX</i>     | This study                                    |

**Table S2. Oligonucleotide sequences**

| Oligo Name               | Sequence                                                                           |
|--------------------------|------------------------------------------------------------------------------------|
| 28-FLO9-RT-F2            | TTATTGTTTACTACTAGCCATCGTCACA                                                       |
| 34-FLO10-RT-R2           | CGCAATCGTCATTTTCACGTTT                                                             |
| 35-FLO11-RT-R2           | CTTGCAATTTGAGCGGCACTAC                                                             |
| 36-ACT1-RT-F1            | CTCCACCACTGCTGAAAGAGAA                                                             |
| 37-ACT1-RT-R1            | CCAAGGCGACGTAACATAGTTTT                                                            |
| 38-ACT1-MGB1             | TTGTCCGTGACATCAA                                                                   |
| 43-FLO9-MGB-F1           | CATGCCTGCCAGCAA                                                                    |
| 44-FLO10-MGB-R1          | TTTAACGCCACGCTTCA                                                                  |
| 45-FLO11-MGB-R1          | ATCCACACCTGACAGCT                                                                  |
| 46-FLO1-RT-F3            | ATCGCTATATGTTTTTGGCAGTCTTTA                                                        |
| 47-FLO5-RT-F3            | GCACACCACTGCATATTTTTGGTAA                                                          |
| 48-FLO1-5-RT-R3          | GTAAGCACGCCTCTGTGGCT                                                               |
| 49-FLO9-RT-R3            | AAGTTTACATTCATACCATTCTTCCTGA                                                       |
| 50-FLO10-RT-F3           | CTGAATATAGCGCTTCCCAGGT                                                             |
| 51-FLO11-RT-F3           | CACTTTTGAAGTTTATGCCACACAAG                                                         |
| 52-FLO1-MGB-F1           | ACTTCTGGCACTAACTAGT                                                                |
| 53-FLO5-MGB-F1           | CCTTTCTGGCACTAATT                                                                  |
| 61-FLO1-DEL-F1           | AAGCTCTCTTCCGGGTTCTTATTTTTAATTCTTGTACCAGT<br>AAACAGAACATCC-CGGATCCCCGGGTTAATTAA    |
| 63-FLO1-5-9-DEL-R1       | TTAGCAAAGAAAAGATACACAGATACGTAAAAAGAACGCG<br>AATTTTATTAATAATTG-GAATTCGAGCTCGTTTAAAC |
| 91-pTEF- <i>FLO1</i> -F1 | CTTCCGGGTTCTTATTTTTAATTCTTGTACCAGTAAACAGA<br>ACATCCAAAAGAATTTCGAGCTCGTTTAAAC       |
| 92-pTEF- <i>FLO1</i> -R1 | GTGCCAGAAGTGTAAGACTGCCAAAACATATAGCGATG<br>AGGCATTGTCATCATT TGAGATCCGGGTTTT         |
| 443-DAN1-HYG-F1          | TTCTTCTTTTTCAGATAAAAAGTGTAGCATACTAAATATATAC<br>CCCAAGTATGCCATCTTTGTACAGCTTGCT      |
| 444-DAN1-HYG-R1          | TTCAATTATTTTACATCATTTATACAACGTACAGGGCCGCA<br>CATGATCACGCAGAGCCGTGGCAGG             |
| 445-YKR104W-HYG-F1       | CTGAAACTGCTCAATGGATCATAAAAAGTATTTTCAAGCGTT<br>GAACTTTTGTGCCATCTTTGTACAGCTTGCT      |
| 446-YKR104W-HYG-R1       | TACTTCGTAGCTAGAACTGGAATGAATAAAAATAGGAAATT<br>CTAGTTGTCCGCAGAGCCGTGGCAGG            |
| 447-HSP30-HYG-F1         | CAAGTTTGAGACTTTAATATCTTTTGATTACTAAAACAAC<br>AAATTTCAATGCCATCTTTGTACAGCTTGCT        |
| 448-HSP30-HYG-R1         | TGTTTTGAAATGTGTTAAGCAAAGAATGATTAAGACAATCT<br>CAAGCTGCTCGCAGAGCCGTGGCAGG            |
| 449-YDR222W-HYG-F1       | CAGTGAGGGCGTATAAGATACATCGTACATACATAGAGACT<br>CATTTAGTGTGCCATCTTTGTACAGCTTGCT       |
| 450-YDR222W-HYG-R1       | AAAAAAAAGGACAAAAACGAATTTTCATGTGGAAGTGTTT<br>ACGCTTTTGTGCGCAGAGCCGTGGCAGG           |
| 451-STP4-HYG-F1          | AACACTGGAGCGCTTGAATATTTGTTACTTCTTTTCTTTGG<br>CTTCCCCTTGCCATCTTTGTACAGCTTGCT        |
| 452-STP4-HYG-R1          | ATAAATGTATGTATGTGTGTATGTATGAGTCGGTGAATG<br>ACTTTGGTTCGCAGAGCCGTGGCAGG              |
| 453-TPO3-HYG-F1          | TCATTATTTAATTTTGCATTAGTACTCCTCTAGCCAAAGAT                                          |

|                       |                                                                                        |
|-----------------------|----------------------------------------------------------------------------------------|
|                       | AAACAGAATGCCATCTTTGTACAGCTTGCCT                                                        |
| 454-TPO3-HYG-R1       | CTACTACTATAATTTTCATTATTATGCTCGATTTCGTA AAAATCGTTACTCCGCAGAGCCGTGGCAGG                  |
| 455-YIL057C-HYG-F1    | TGCAAACGAAACAACGTACAGTATATAACAAAGTATTTTAAATAATAAGATGCCATCTTTGTACAGCTTGCCT              |
| 456-YIL057C-HYG-R1    | TTTCGTAAATTCATAAAAATTTTCGTTAATTCATAAAAACAGCTCCCCAAACCGCAGAGCCGTGGCAGG                  |
| 457-TIR4-HYG-F1       | GAAACCAGCAACAAAAACCTATTCCTACTCGTTATTAATACCATAAAAAATTGCCATCTTTGTACAGCTTGCCT             |
| 458-TIR4-HYG-R1       | AATAATAATATAATCATAAGCGGAACGAACATTTTCGACACGTACTAAAACGCAGAGCCGTGGCAGG                    |
| 459-SPG4-HYG-F1       | AGCCACTTCTGTAACAAGATAAATAAAAACCAACTAATCGAGATATCAAATTGCCATCTTTGTACAGCTTGCCT             |
| 460-SPG4-HYG-R1       | TTAGAATAAATAGACAACACAAGAAAAGACACTATGAATATCTCCTCCATCGCAGAGCCGTGGCAGG                    |
| 461-SPG1-HYG-F1       | ACAATCAATACAAATATTTAGCGCATAAAAATTCAAACAAAGTTTACTGAATGCCATCTTTGTACAGCTTGCCT             |
| 462-SPG1-HYG-R1       | GAAAACAAAATGCAAAGAACATAAATGCAGGGAACCAAGTACAAATTCCTCCGAGAGCCGTGGCAGG                    |
| 463-DAN1-prom-F2      | AAGCTCAAAATATCTTTGGAGTTTGACAAT                                                         |
| 464-YKR104W-prom-F2   | TATGCCAAGTTACGTTTTTCATAATGTCACG                                                        |
| 465-HSP30-prom-F2     | ATCGAAAGCGTGCTTTGTAAGAATATTG                                                           |
| 466-YDR222W-Prom-F2   | CGGAGAACTAAGTCATAGACGTAATGCTAA                                                         |
| 467-STP4-prom-F2      | GTTTTCTACTACTGATAGCTCCCATCCGCA                                                         |
| 468-TPO3-Prom-F2      | GTTCTCCAAAGTGAATACAATAAGCAGTAT                                                         |
| 469-YIL057C-Prom-F2   | AACCTTTTCGGCGGTTGGCAATCGTCCGTA                                                         |
| 470-TIR4-Prom-F2      | CCAGATTCGTGTGTGTGTAATAATTCGTTT                                                         |
| 471-SPG4-Prom-F2      | GTCATGATTTACGTATAACTAACACATCATG                                                        |
| 472-SPG1-Prom-F2      | AGAGAAGAATTACGGGATACTGGGATAACA                                                         |
| 1751-TDH3-pKT-F       | TTTAAAACACCAAGAAGCTTAGTTTCGAATAAACACACATAAACAAACAAAGGTGACGGTGCTGGTTTA                  |
| 1752-TDH3-pKT-R       | CTAAGTCATAAAGCTATAAAAAGAAAATTTATTTAAATGCAAGATTTAAATCGATGAATTCGAGCTCG                   |
| 1921-TDH3-upYRO-F     | GTACCGCTTTGGGAGGCCATCTTGGTTGTGTCCTCGTATGGCAGCATCTGCCATTGAGTTTATCATTATCAATACTGCCATTTC   |
| 1922-TDH3-upYRO-R     | GGTGATTTTCGGAAACATGCAGAAGAGTCCTTAGAAATCTTAGGTAAATTCCTCGGCATGACAAGAACAATGCAATAGCGCA     |
| 1899-HIS-sub-HYG-F    | TCCTTTTAAAATCTTGCTAGGATACAGTTCTCACATCACATCCGAACATATGCCATCTTTGTACAGCTTGCCT              |
| 1924-TDH3-upYRO-HYG-R | GGTGATTTTCGGAAACATGCAGAAGAGTCCTTAGAAATCTTAGGTAAATTCCTCGGCATCGCAGAGCCGTGGCAGG           |
| 1926-TDH3-PYK-F       | CAACTATATTTTACTTTCATCCTCTACGTCCATTGTAAGATTACAACAAAAGCACTATCGTTTATCATTATCAATACTGCCATTTC |
| 1929-TDH3-PYK-HYG-R   | ACTGACACAATGGACAATTAATAAAAATTAAGAAAAAAAATAAGGACTTTAATTTTTACGCAGAGCCGTGGCAGG            |
| 1942-FLO1-paradoxus-F | TACCGCTTTAAAATGCCTAGTCTTGGGTGAGGTCTCGTATGGCAGCATCTGTTATTGAGATCCAAAAGAATTCGAGCTCGTTAAAC |
| 1943-FLO1-paradoxus-R | GGTGATTTTCGGAAACATGCAGAAGAGTCCAAAGAAATCTT                                              |

|                      |                                                                                 |
|----------------------|---------------------------------------------------------------------------------|
|                      | AGGTAAATTCACTCGGCATCAATTTGAATATTTGAAAGTAT<br>GGA                                |
| 2035-KANMX-in-EM93-F | CACAATGTAA ATCTTGCTTT GGGTTGACTG AGGGAATAA<br>CTATAGACAT – CGGATCCCCGGGTTAATTAA |
| 2036-KANMX-in-EM93-R | ATCACGGAAG TGGTACCAA ATCGGTAGGT TGTTTTCAAT<br>TTACCCTTT – GAATTCGAGCTCGTTTAAAC  |

## Supplemental Experimental Procedures

### *Gene array analysis*

Fresh cultures were inoculated for pre-cultures and samples were taken after 24 hours of growth. Total RNA was prepared using a standard phenol-chloroform extraction method. Samples were purified using the RNeasy Mini Kit (Qiagen) and RNase-Free DNase (Qiagen). First- and second-strand synthesis, in vitro transcription, hybridization, and scanning were performed according to the Affymetrix protocol. Samples were probed on Affymetrix Yeast Genome S98 chips. Basic analysis was carried out using the Affymetrix GCOS software package. Raw data and tables with enrichment analysis are available at: <http://sysbio.harvard.edu/csb/verstrepen/resources.html>. All arrays were scaled to an average intensity of 100 using all measured expression levels. Genes were ranked according to their ability to distinguish between flocculation and non-flocculation. Induction and repression of specific gene groups in flocculating versus non-flocculating conditions was studied using Gene Set Enrichment Analysis (GSEA) as described previously (Subramanian et al., 2005). Significance was estimated based on a gene label permutation. Gene sets with a nominal p-value below 0.01 and a false discovery rate (FDR) below 0.25 were considered to be significant. Expression differences between gene sets were visualized using the GenePattern software (Reich et al., 2006). Expression levels in each gene set were normalized by mean centering and unit scaling prior to visualization.

### *Fitness measurements*

Relative Malthusian fitness was determined as described before (Thompson et al., 2006). Briefly, cultures inoculated with equal numbers of KV210 cells and a nonflocculent reference strain (KV22) were grown for 24 hours and used to inoculate fresh cultures. After 10 transfers ( $\pm 80$  cellular generations), the ratio of flocculent versus non-flocculent cells was determined. The experiment was carried out in YPGal medium (to induce flocculation in the flocculent KV210 strain) and in YPD (control, no *FLO1* expression in either strain). Flocculation was inhibited by adding  $0.2 \text{ g ml}^{-1}$  mannose (Sigma Aldrich) to the medium. The selective advantage  $s$  (fitness factor) was calculated as  $s = (\ln(F_f/R_f) - \ln(F_i/R_i))/T$ , where  $F$  and  $R$  are the numbers of flocculent and reference cells, the subscripts refer to final and initial populations, and  $T$  is the number of generations that the reference cells have proliferated during the competition.

### Supplemental References

- Brachmann, C.B., Davies, A., Cost, G.J., Caputo, E., Li, J.C., Hieter, P., and Boeke, J.D. (1998). Designer deletion strains derived from *Saccharomyces cerevisiae* S288C: a useful set of strains and plasmids for PCR-mediated gene disruption and other applications. *Yeast* 14, 115-132.
- Mortimer, R.K., and Johnston, J.R. (1986). Genealogy of principal strains of the Yeast Genetic Stock Center. *Genetics* 113, 35-43.
- Reich, M., Liefeld, T., Gould, J., Lerner, J., Tamayo, P., and Mesirov, J.P. (2006). GenePattern 2.0. *Nat Genet* 38, 500-501.

Subramanian, A., Tamayo, P., Mootha, V.K., Mukherjee, S., Ebert, B.L., Gillette, M.A., Paulovich, A., Pomeroy, S.L., Golub, T.R., Lander, E.S., *et al.* (2005). Gene set enrichment analysis: a knowledge-based approach for interpreting genome-wide expression profiles. *Proc Natl Acad Sci U S A* *102*, 15545-15550.

Thompson, D.A., Desai, M.M., and Murray, A.W. (2006). Ploidy controls the success of mutators and nature of mutations during budding yeast evolution. *Curr Biol* *16*, 1581-1590.

Verstrepen, K.J., Jansen, A., Lewitter, F., and Fink, G.R. (2005). Intragenic tandem repeats generate functional variability. *Nat Genet* *37*, 986-990.
